# Supplementary material for: Feasibility of Using Dynamic Time Warping to Measure Motor States in Parkinson’s Disease
Source: Hindawi journal article supplement (doi:10.1155/2020/3265795), 2020-02-14
Supplement: f1 [file 3265795.f1.pdf]

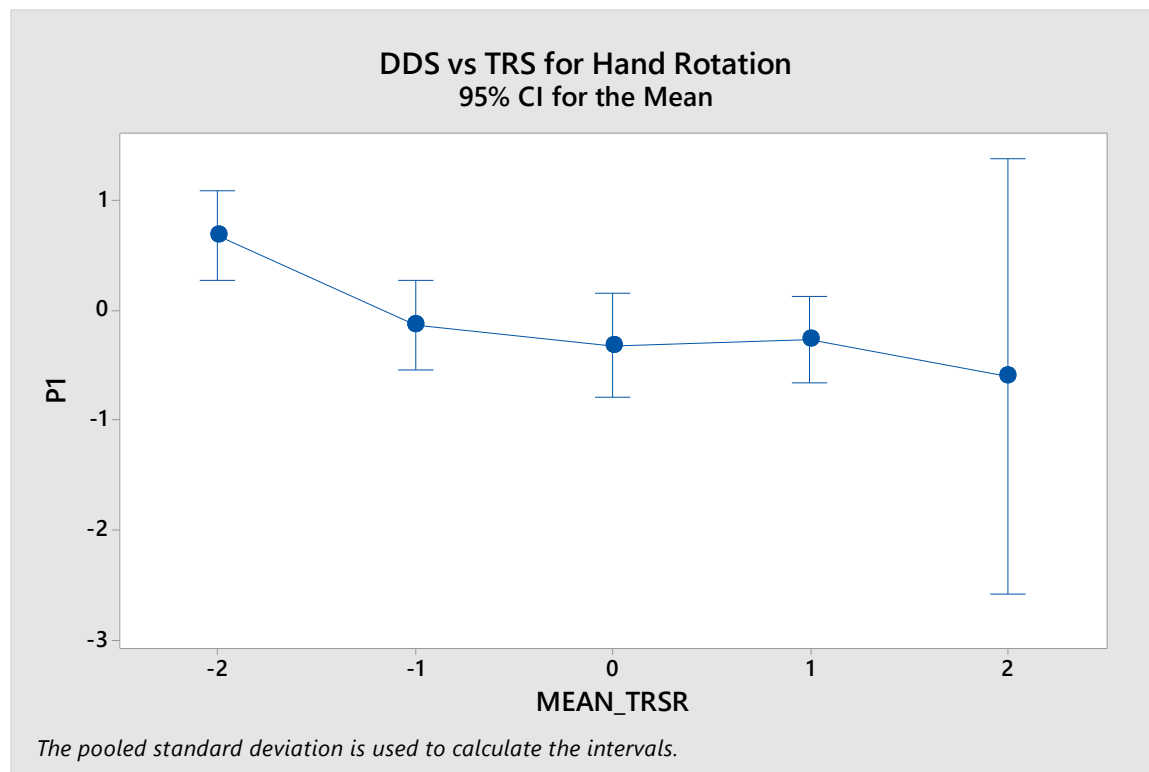

Figure 1. Comparison of means for DDS extracted from hand rotation data across groups of patients at different motor states scored by clinical TRS. In the Y-axis the negative values mean Off state and the positive values mean On state. H is the group of healthy subjects. DDS was not significantly different between the groups.

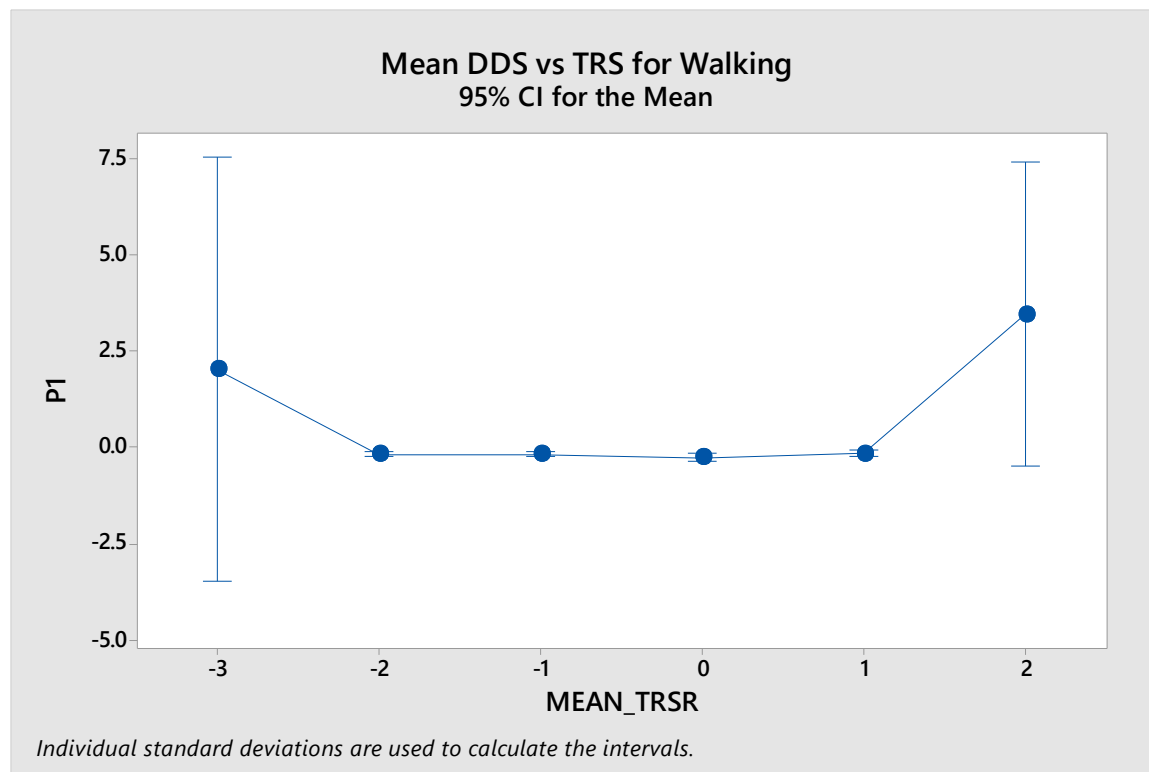

Figure 2. Comparison of means for DDS extracted from walking data across groups of patients at different motor states scored by clinical TRS. In the Y-axis the negative values mean Off state and the positive values mean On state. H is the group of healthy subjects. DDS was not significantly different between the groups.

Results for setting first test as reference test:

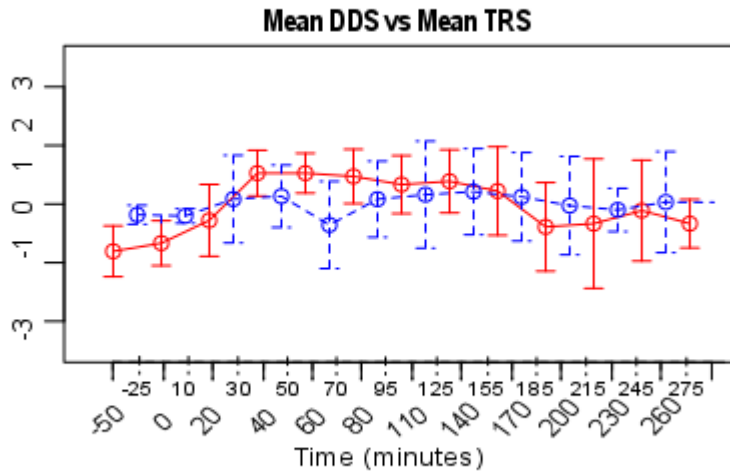

Figure 3. DDS scores were calculated between signals of each test vs first test (baseline) using the leg agility data. Mean DDS for PD patients (dashed, blue line) vs mean TRS scores (straight, red line) across the time points  $\pm 0.95$  confidence intervals of the mean for each test occasions. None of the mean DDS for patients, mean DDS for healthy controls, and mean TRS scores were significantly different from each other. Mean DDS did not show a similar trend to mean TRS scores.
